# Supplementary material for: RNA helicase-mediated regulation of snoRNP dynamics on pre-ribosomes and rRNA 2′-O-methylation
Source: PubMed Central journal article supplement — Nucleic Acids Res. 2021 Mar 15;49(7):4066–84. doi: 10.1093/nar/gkab159 (PMC8053091; doi:10.1093/nar/gkab159), 2021-03-15
Supplement: gkab159_supplemental_file.pdf [file gkab159_supplemental_file.pdf]

## SUPPLEMENTARY MATERIAL

### RNA helicase-mediated regulation of snoRNP dynamics on pre-ribosomes and rRNA 2'-O-methylation

Gerald Ryan R. Aquino, Nicolai Krogh, Philipp Hackert, Roman Martin, Jimena Davila Gallesio, Robert W. van Nues, Claudia Schneider, Nicholas J. Watkins, Henrik Nielsen, Katherine E. Bohnsack, Markus T. Bohnsack

## SUPPLEMENTARY FIGURES

**Supplementary Figure S1. Generation of yeast strains lacking Dbp3 or expressing Nop56 at a reduced level. (A)** Schematic view of the PCR-based approach to verify the identity of the yeast strains generated. **(B)** Genomic DNA extracted from the indicated yeast strains was used as a template for PCR reactions using the primer pairs indicated. PCR products were visualised using SafeView and UV light. **(C)** RNA extracted from wild type yeast or cells of the *NOP56DAmP* strain was separated by denaturing PAGE and subjected to northern blotting using probes hybridising to the indicated snoRNAs and the 5S rRNA was used as a loading control.

**Supplementary Figure S2. RNase H analysis of Am876, Um898, Um2724 and Gm2619 in snoRNA deletion strains. (A)** The normalized numbers of sequencing reads mapping to the 18S and 25S rRNAs was determined in the RMS datasets for wild type yeast and the  $\Delta dbp3$  strain. Relative rRNA levels from three biologically independent RMS experiments is shown as mean  $\pm$  standard error and significance was determined using Student's t-test (\*= $p < 0.05$ , \*\*= $p < 0.01$ , \*\*\*= $p < 0.001$  n.s.= non-significant). **(B-E)** RNA from wild type yeast or  $\Delta snr78-72$ ,  $\Delta snr40$  or  $\Delta snr67-snr53$  annealed to chimeric RNA-DNA oligonucleotides targeting the 25S-Am876, 25S-Um898, 25S-Um2724 or 25S-Gm2619 sites as appropriate was either treated with RNase H (RH, +) or left untreated (-). Samples were separated by denaturing agarose gel electrophoresis and northern blotting was performed using probes hybridising both

upstream and downstream of the modification sites. Specific cleavage products are indicated by arrow heads; Asterix indicates non-specific cleavage products.

**Supplementary Figure S3. The levels of snoRNAs guiding Dbp3-dependent 2'-O-methylation are not affected by the absence of Dbp3.** (A) The numbers of sequencing reads mapping to each snoRNA was determined in the RMS datasets for wild type yeast and the  $\Delta dbp3$  strain. Relative snoRNA levels from two biologically independent RMS experiments in shown as mean  $\pm$  standard error. (B) RNA extracted from wild type yeast or cells of the  $\Delta dbp3$  strain was separated by denaturing PAGE and subjected to northern blotting using probes hybridising to the indicated snoRNAs and the 5S rRNA was used as a loading control.

**Supplementary Figure S4. Structure and maturation of the U24 snoRNA.** (A) RNA extracted from wild type yeast or cells of the  $\Delta dbp3$  strain was separated by denaturing PAGE and subjected to northern blotting using probes hybridising to the indicated snoRNAs and the 5S rRNA was used as a loading control. (B and C) RMS sequencing reads derived from wild type yeast and the  $\Delta dbp3$  strain were mapped to the annotated U24 sequence  $\pm$  50 nt, and after normalisation for expression level, the numbers of reads mapping to each nucleotide were determined. Profiles for the 5' end (B) and 3' end (C) are shown. Nucleotides of box C (B) and box D (C) are underlined and the annotated 5' and 3' ends (58) are indicated. (D) Schematic view of the secondary structure of the pre-U24 snoRNA with key features indicated. Basepairing is shown according to (59).

**Supplementary Figure S5. Levels of box H/ACA snoRNAs on pre-ribosomes in cells lacking Dbp3 compared to wild type.** Wild type yeast and the  $\Delta dbp3$  strains were used to prepare cell extracts that were separated by sucrose density gradient centrifugation. Fractions containing either (pre-)ribosomal complexes or non-(pre-)ribosome associated proteins were pooled and RNA was extracted. Polyadenylation and reverse transcription were performed

and the level of each of the 75 yeast snoRNAs in each sample was determined by qPCR. The relative distribution of each box H/ACA snoRNA between (pre-)ribosome-bound and non-ribosome-associated fractions was calculated and differences in this ratio between the wild type and  $\Delta dbp3$  strains are shown graphically. Three independent experiments were performed and the data are presented as mean  $\pm$  standard deviation. # indicates a snoRNA that is observed to accumulate on pre-ribosomes upon depletion of many other RNA helicases and ribosome AFs, and is therefore considered unspecific.

**Supplementary Figure S6. Overview of rRNA 2'-O-methylations affected in  $\Delta dbp3$  mapped on the secondary structure of the 25S rRNA.** 2'-O-methylations reduced in  $\Delta dbp3$  and the snoRNAs that guide them were highlighted on the secondary structure of the 25S rRNA [41] in red and the pre-rRNA nucleotides involved in basepairing interactions with the guiding snoRNAs are indicated in green. Extra snoRNA basepairing is shown in blue. The areas shown in Figure 6 as magnified views are indicated with boxes with labels corresponding to the individual panels.

**Supplementary Figure S7. Pre-ribosome-association and overexpression of snR67. (A)** Whole cell extracts prepared from wild type yeast and the  $\Delta dbp3$  strain were separated by sucrose density gradient centrifugation. RNA from individual fractions was separated by denaturing PAGE and analysed by northern blotting using probes to detect the snR67 snoRNA. The fractions containing "free" snoRNAs and pre-ribosome-associated snoRNAs are indicated. The upper panel is reproduced from Figure 6F. **(B)** RNA extracted from wild type yeast or  $\Delta dbp3$  cells transformed with either an empty pRS416 plasmid or a construct for overexpression of snR67 (snR67<sub>OE</sub>) was separated by denaturing PAGE and subjected to northern blotting for the snR67 and snR64 snoRNAs. Mature 5.8S rRNA, visualised by methylene blue staining, served as a loading control.

**Supplementary Figure S8. snoRNA and rRNA levels in wild type yeast and the pGAL<sub>S</sub>-HA-Prp43 strain grown in glucose-containing media. (A-B)** The numbers of sequencing reads mapping to each snoRNA (A), and the 18S and 25S rRNAs (B) was determined in the RMS datasets for wild type yeast and the pGAL<sub>S</sub>-HA-Prp43 strain grown in glucose-containing media. Relative snoRNA levels from two biologically independent RMS experiments in shown as mean  $\pm$  standard error.

## SUPPLEMENTARY TABLES

**Supplementary Table 1. DNA oligonucleotides used in this study.** Primers used for qPCR

analysis of snoRNA levels on pre-ribosomes are listed in [29].

| Name    | Sequence (5'-3')                                                                          | Application                                                   |
|---------|-------------------------------------------------------------------------------------------|---------------------------------------------------------------|
| oMB1461 | CGGTTTTAATTGTCCTA                                                                         | Northern blot probe (ITS1)                                    |
| oMB1468 | TGAGAAGGAAATGACGCT                                                                        | Northern blot probe (ITS2)                                    |
| oMB2510 | ATATTAGGATCCGCCATGACAAAGGAAGAAATCGCAG                                                     | Molecular cloning pMB312                                      |
| oMB2511 | ACGCGGTACCCTAATCGAAAGTAATTTTTTTTGGTTTC                                                    | Molecular cloning pMB312                                      |
| oMB2594 | CAGTTTGATATATAGGGGATTAACGGATCCCCGGGT<br>TAATTAA                                           | Genomic deletion of <i>DBP3</i>                               |
| oMB2595 | AACCCCTAATCGAAAGTAATTGAATTCGAGCTCGTTTA<br>AAC                                             | Genomic deletion of <i>DBP3</i>                               |
| oMB2625 | TGATCAGTCGACCGTTATTTATTTT                                                                 | $\Delta dbp3$ deletion strain<br>verification (forward)       |
| oMB2632 | CTGCAGCGAGGAGCCGTAAT                                                                      | $\Delta dbp3$ deletion strain<br>verification (Kan MX6;TPB)   |
| oMB3405 | GAAGATAGACGAAATAGGAACAACAAACAGCTTATAA<br>GCACCCAATAAGTGC GTTCGGATCCCCGGGTAAATTA<br>A      | Genomic deletion of <i>RRP6</i>                               |
| oMB3406 | GAGGTCTTAAATGAAAATTACCATAATTTATAAATAAAA<br>AAATACGCTTGT TTTACATAAGAATTCGAGCTCGTTTA<br>AAC | Genomic deletion of <i>RRP6</i>                               |
| oMB3409 | TGACAGAACCATTTTCATGTTCAATA                                                                | $\Delta rrp6$ deletion strain<br>verification (forward)       |
| oMB3412 | ATGTGAAGAAAAGAATTCCTGACAC                                                                 | $\Delta rrp6$ deletion strain<br>verification (reverse)       |
| oMB3958 | AAGTTCTCTAGTTGGGGAAATGACT                                                                 | $\Delta dbp3$ deletion strain<br>verification (reverse)       |
| oMB5759 | CGATAGTATAACCTTATAAACGCGCATAGAAAGATTAG<br>GACTGCAAGAATAATAATGCGTACGCTGCAGGTTCGAC          | Genomic integration of<br>pGALs promoter for <i>PRP43</i>     |
| oMB5760 | GGAATAGAGGTCTCAACTGGATCCGGGTGTTCCGAC<br>GAGAATCTTCTTTTGGAAACCATCGATGAATTCTCTGT<br>CG      | Genomic integration of<br>pGALs promoter for <i>PRP43</i>     |
| oMB6716 | ATATATGGATCCGGTTACTGCGTATTCGATTCTTTA<br>CTGG                                              | Molecular cloning pMB1401                                     |
| oMB6717 | ATATATGCGGCCGCTGGTCCAATATTTGACGTTTCTA<br>G                                                | Molecular cloning pMB1401                                     |
| oMB6720 | GTTAATTACTTAGTATTAGACCAGGCAGACAGAATGTT<br>GGAAAAAGG                                       | Site-directed mutagenesis<br>( <i>Dbp3</i> <sub>E263Q</sub> ) |
| oMB6721 | CCTTTTCCAACATTCTGTCTGCCTGGTCTAATACTAA<br>GTAATTAAC                                        | Site-directed mutagenesis<br>( <i>Dbp3</i> <sub>E263Q</sub> ) |
| oMB1465 | CTCCGCTTATTGATATGC                                                                        | Northern blot probe 25S<br>rRNA (RNase H)                     |
| oMB7263 | GCCTGCTATGGTTCAGCGACG                                                                     | Northern blot probe 25S<br>rRNA (RNase H)                     |
| oMB6327 | CTGTCTAGATGAACAAACACC                                                                     | Northern blot probe 25S<br>rRNA (RNase H)                     |
| oMB8611 | AAAACCTCGAGCTTCAACCTGTACGTGGATGG                                                          | Cloning snR67 for<br>overexpression                           |
| oMB8612 | AAAAGGTACCGAGGAGTGATAATGGCAATTAAGAC                                                       | Cloning snR67 for<br>overexpression                           |
| oMB1537 | GGTGATTAACGACAGCATTGTCAAAGACTAGTCGA                                                       | Northern blot probe snR59                                     |
| oMB1633 | CAGTGTGTTGTTGTTTGTAAAATCAG                                                                | Northern blot probe snR67                                     |
| oMB1635 | CAGTCATTTCAAAGATCCGCTTGG                                                                  | Northern blot probe snR67                                     |

|         |                                                                                       |                                                                   |
|---------|---------------------------------------------------------------------------------------|-------------------------------------------------------------------|
| oMB6021 | GATTCAGAAACTCTAGTTTG                                                                  | Northern blot probe snR78                                         |
| oMB6022 | GAATAAACGTTCTAATCAC                                                                   | Northern blot probe snR78                                         |
| oMB6887 | GATGGTGATAAGTTACGACAGC                                                                | Northern blot probe snR39                                         |
| oMB1544 | CGACAGCATCGTCAATGACTAGTCTCGAATATGTATTGG                                               | Northern blot probe snR39                                         |
| oMB1545 | GGTGATAAGTTACGACAGC                                                                   | Northern blot probe snR39                                         |
| oMB6772 | GGTATGTCTCATTTCGGAACCTCAAAG                                                           | Northern blot probe U24                                           |
| oMB6773 | GTGATAATTGGTATGTCTCATTTCGG                                                            | Northern blot probe U24                                           |
| oMB1541 | GCTGCAAATTGCTACCTCTTTCA                                                               | Northern blot probe snR50                                         |
| oMB1548 | TGCTAGTCACTTTTTGGAATGCC                                                               | Northern blot probe snR39b                                        |
| oMB6689 | CTGAGTACTTGTGGCATCCATG                                                                | Northern blot probe snR40                                         |
| oMB1928 | TTCCAAAGGAATCATCG                                                                     | Northern blot probe snR55                                         |
| oMB1551 | CATTTGATGAGACGTTTTCTTCA                                                               | Northern blot probe snR72                                         |
| oMB6770 | GGTTTATAGCATTGTCACTAAGGACG                                                            | Northern blot probe snR69                                         |
| oMB6771 | GCTGGGTTTATAGCATTGTCACTAAG                                                            | Northern blot probe snR69                                         |
| oMB1546 | GTCAGATACTGTGATAGTC                                                                   | Northern blot probe U18                                           |
| oMB1550 | CTTCATTTTCGATAGTATGTTCAATCAG                                                          | Northern blot probe snR60                                         |
| oMB2213 | GTCACAGGCGAAATATCATCAAAGTTAATC                                                        | Northern blot probe snR73                                         |
| oMB6745 | CCCGCTAAAGCATTGTCACTC                                                                 | Northern blot probe snR76                                         |
| oMB6888 | CGTGCGTCTGATTATGGTCC                                                                  | Northern blot probe snR63                                         |
| oMB4421 | CGGACGGGAAACGGTGCTTTCTGGTAGATATGG                                                     | Northern blot probe 5S rRNA                                       |
| oMB1828 | TCCTTTAGAGATGATAAAGACAACCTTACAAGTACAGTT<br>TTTTGTTGGTATCTCATCGGATCCCCGGGTTAATTAA      | Genomic deletion of <i>SNR67-SNR53</i>                            |
| oMB7727 | CTAATTCCAATACGAAGAGCCTAATTCTTTGATAGTTC<br>CTTTCTTTTCTAGTTTAGAGAATTCGAGCTCGTTTAA<br>AC | Genomic deletion of <i>SNR67-SNR53</i>                            |
| oMB1845 | ATCACTAACAGATGAAAAAGGTAGAATGGATAAAATAC<br>TTAAAGAATTTTATATGGAATTCGAGCTCGTTTAAAC       | Genomic deletion of <i>SNR72-78</i>                               |
| oMB6001 | GTTAGTTTTTTCAGATATGTCTTTTGTGATTATCACAGG<br>CCAGCTGAAGCTTCGTACCG                       | Genomic deletion of <i>SNR72-78</i>                               |
| oMB1832 | TAGTACCTTAACACATGACGAAGATGAAAATTAACAT<br>GAATTCAAGGAAAAATGCGGATCCCCGGGTTAATTAA        | Genomic deletion of <i>SNR40</i>                                  |
| oMB1848 | TCATAATACAGTCACAGATGTGAGAGAAAAA<br>GAAAATAAGGAAAAATGGAATTCGAGCTCGTTTAAAC              | Genomic deletion of <i>SNR40</i>                                  |
| oMB7718 | GCCCTAACTTTCCACCTCGC                                                                  | $\Delta snr67$ deletion strain verification                       |
| oMB7719 | CTAATTCCAATACGAAGAGC                                                                  | $\Delta snr67$ deletion strain verification                       |
| oMB6006 | CGTATCTTAGCATTACCCGC                                                                  | $\Delta snr72-snr78$ deletion strain verification                 |
| oMB7721 | CATCTAGTTCTTTGTCCAAAG                                                                 | $\Delta snr72-snr78$ deletion strain verification                 |
| oMB7714 | GAACACAACATTAATAAATGG                                                                 | $\Delta snr40$ deletion strain verification                       |
| oMB7715 | CTCCGAGCCATATCGGAAAG                                                                  | $\Delta snr40$ deletion strain verification                       |
| oMB9191 | GTAGATGAGGAGGTAATTGAAAAAAGAAGGGTGAGA<br>AGGAAGTGAAG                                   | Site-directed mutagenesis ( <i>Dbp3<math>\Delta</math>22-48</i> ) |
| oMB9192 | CTTCCACTTCCTTCTCACCTTCTTTTTTCAATTACCT<br>CCTCATCTAC                                   | Site-directed mutagenesis ( <i>Dbp3<math>\Delta</math>22-48</i> ) |
| oMB9268 | GTTGTCTGACATGGGTTCTTTAGTT                                                             | <i>NOP65</i> <sub>DAmP</sub> verification strain                  |
| oMB9269 | GATAAACCAGCTGCAGAAGTGAAG                                                              | <i>NOP65</i> <sub>DAmP</sub> verification strain                  |

**Supplementary Table 2. Plasmids used in this study**

| Name    | Description                                                | Application                          |
|---------|------------------------------------------------------------|--------------------------------------|
| pMB031  | pRS415                                                     | Protein expression in yeast          |
| pMB312  | A21-Dbp3                                                   | Protein expression in <i>E. coli</i> |
| pMB1400 | A21-Dbp3 <sup>E263Q</sup>                                  | Protein expression in <i>E. coli</i> |
| pMB1401 | pRS415-Dbp3 <sup>+/</sup> -500                             | Yeast complementation                |
| pMB1402 | pRS415-Dbp3 <sup>E263Q</sup> <sup>+/</sup> -500            | Yeast complementation                |
| pMB1730 | pRS416- <i>ACT</i> intron-pGAL <sub>1</sub>                | Yeast complementation                |
| pMB1732 | pRS416- <i>ACT</i> intron-pGAL <sub>1</sub> - <i>SNR67</i> | Yeast complementation                |
| pMB1822 | pRS415-Dbp3 <sup>Δ22-48</sup> <sup>+</sup> -500bp          | Yeast complementation                |

**Supplementary Table 3. Yeast strains used in this study**

| Name           | Genotype                                      | Reference  |
|----------------|-----------------------------------------------|------------|
| YMB006/BY4741a | <i>MATa;hisΔ1;leu2Δ0;met15Δ0;uraΔ0</i>        | Euroscarf  |
| YMB724         | YMB006; <i>dbp3::kanMX6</i>                   | This study |
| YMB909         | YMB006; <i>rrp6::kanMX6</i>                   | This study |
| YMB1088        | YMB006; pGAL <sub>s</sub> <i>prp43 natNT2</i> | This study |
| YMB1487        | YMB006; pMB031 (LEU2)                         | This study |
| YMB1538        | YMB724; pMB1401 (LEU2)                        | This study |
| YMB1539        | YMB724; pMB1402 (LEU2)                        | This study |
| YMB1540        | YMB724; pMB031 (LEU2)                         | This study |
| YMB1566        | YMB006; <i>nop1-HTP (URA3)</i>                | This study |
| YMB1567        | YMB724; <i>nop1-HTP (HIS3)</i>                | This study |
| YMB1718        | YMB006; <i>SNR78-SNR72::natNT2</i>            | This study |
| YMB1720        | YMB724; <i>SNR78-SNR72::natNT2</i>            | This study |
| YMB1748        | YMB006; <i>SNR40::natNT2</i>                  | This study |
| YMB1750        | <i>NOP65DAmP kanMX</i>                        | Dharmacon  |
| YMB1715        | YMB006; <i>SNR67-SNR53::natNT2</i>            | This study |
| YMB1903        | YMB006; pMB1730 (URA3)                        | This study |
| YMB1905        | YMB724; pMB1730 (URA3)                        | This study |
| YMB1895        | YMB006; pMB1732 (URA3)                        | This study |
| YMB1899        | YMB724; pMB1732 (URA3)                        | This study |
| YMB1963        | YMB724; pMB1822 (LEU2)                        | This study |
| YMB1965        | YMB1750; <i>dbp3::kanMX6</i>                  | This study |

**Supplementary Table 4. Chimeric oligonucleotides used for RNase H-based cleavage**

**assays.** mN indicates 2'-O-methylated RNA nucleotides and dN are DNA nucleotides.

| Name/Target modification | Sequence (5'-3')                         |
|--------------------------|------------------------------------------|
| 25S-Am876                | mAmCmGdTdCdAdGmAmAmCmCmGmCmUmAmCmGmAmG   |
| 25S-Um898                | mCmCmAdAdAdTdTmCmGmAmCmGmAmUmCmGmAmUmUmU |
| 25S-Gm2619               | mGmCmCdCdCdAdGmCmCmAmAmAmCmUmCmCmCmAmC   |
| 25S-Um2724               | mUmGmAdAdAdTdTmCmAmAmAmAmUmCmAmAmGmGmGmG |

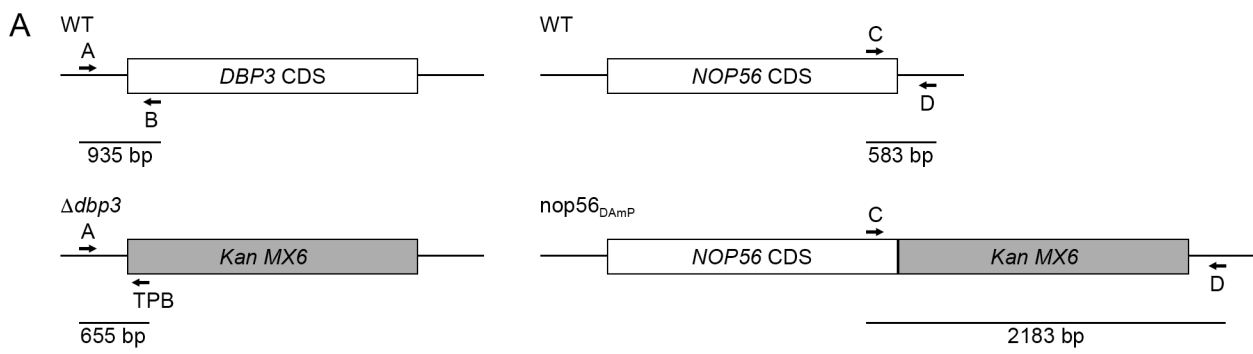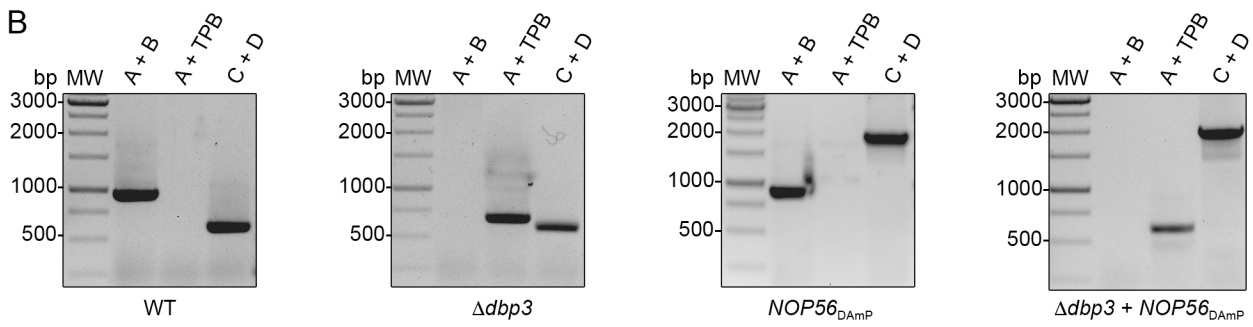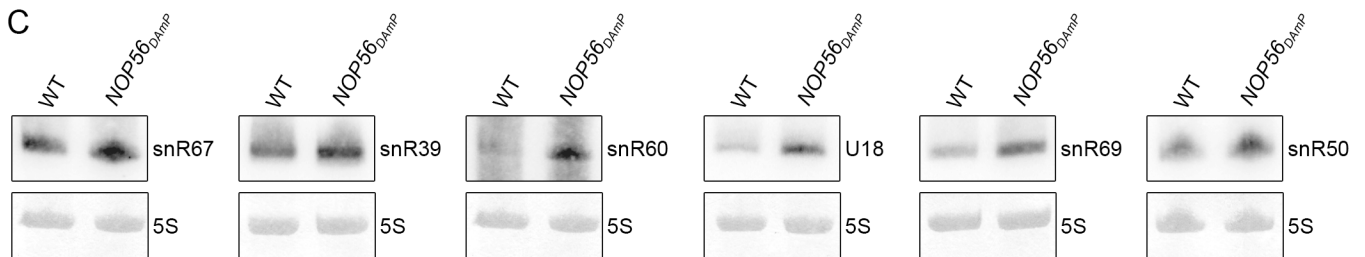

Aquino et al., Supplementary Figure S1



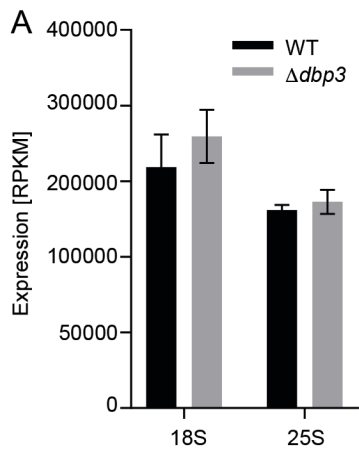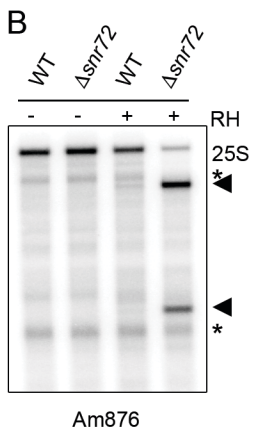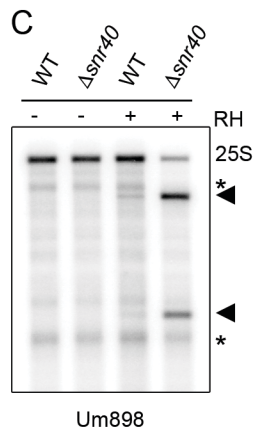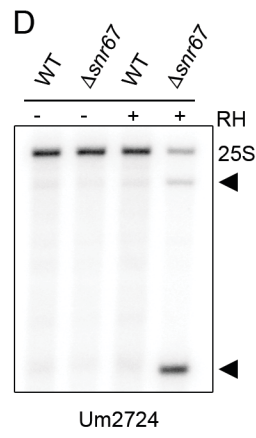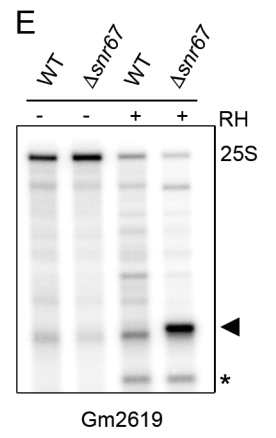

Aquino et al., Supplementary Figure S2

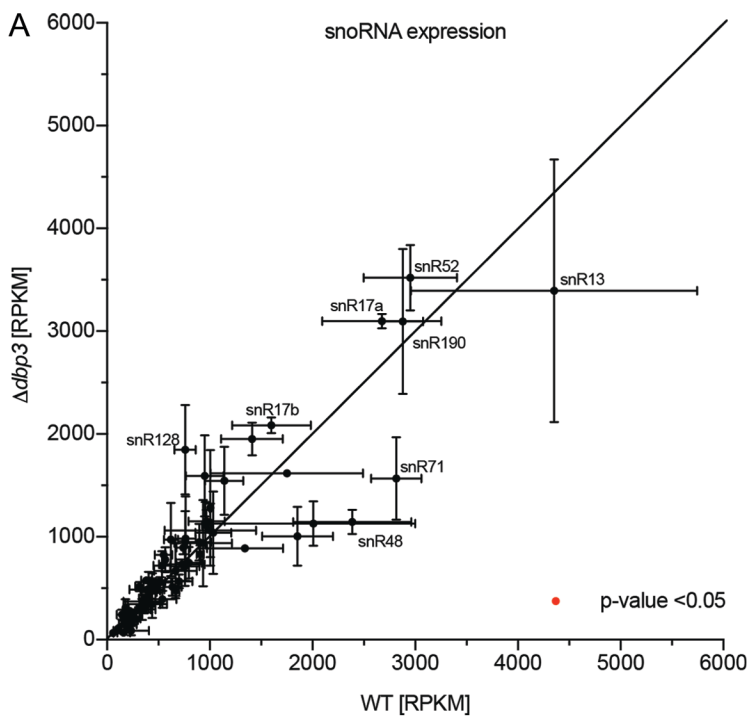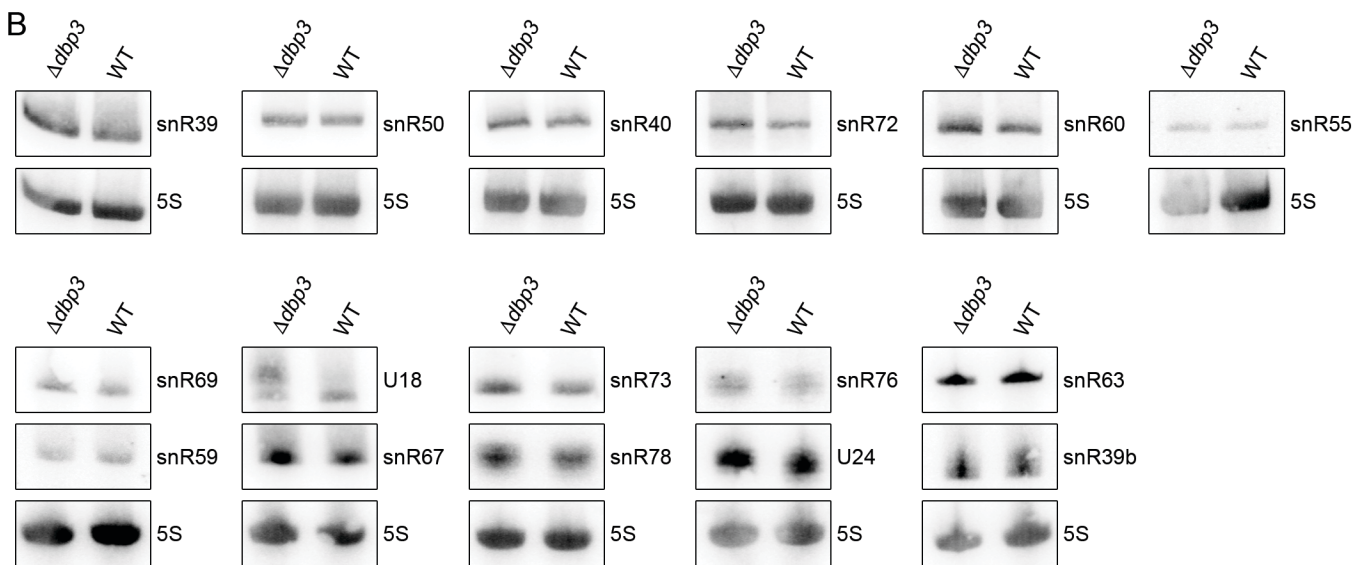

Aquino et al., Supplementary Figure S3

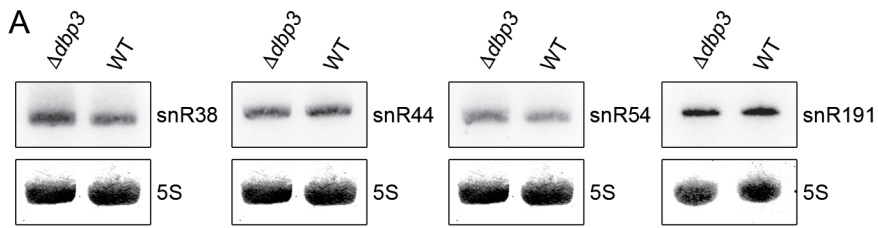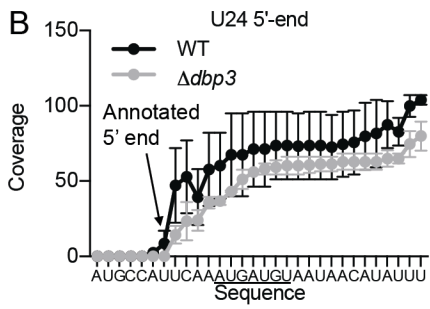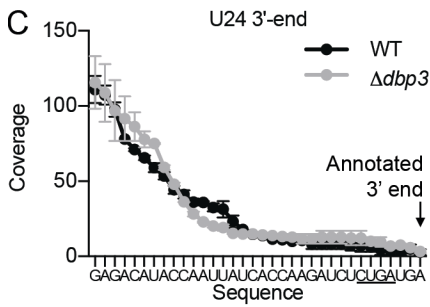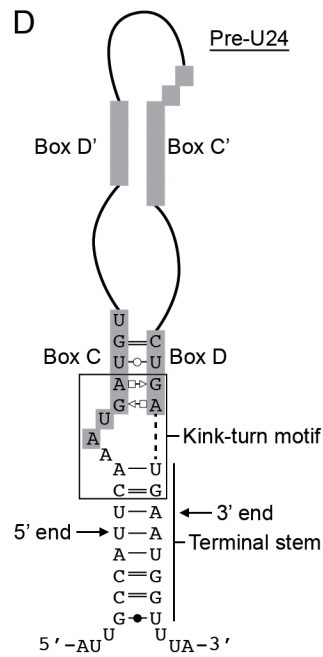

Aquino et al., Supplementary Figure S4

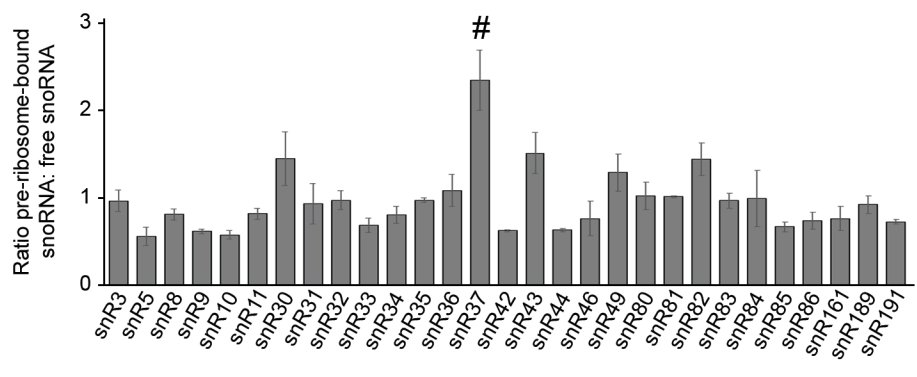

Aquino et al., Supplementary Figure S5

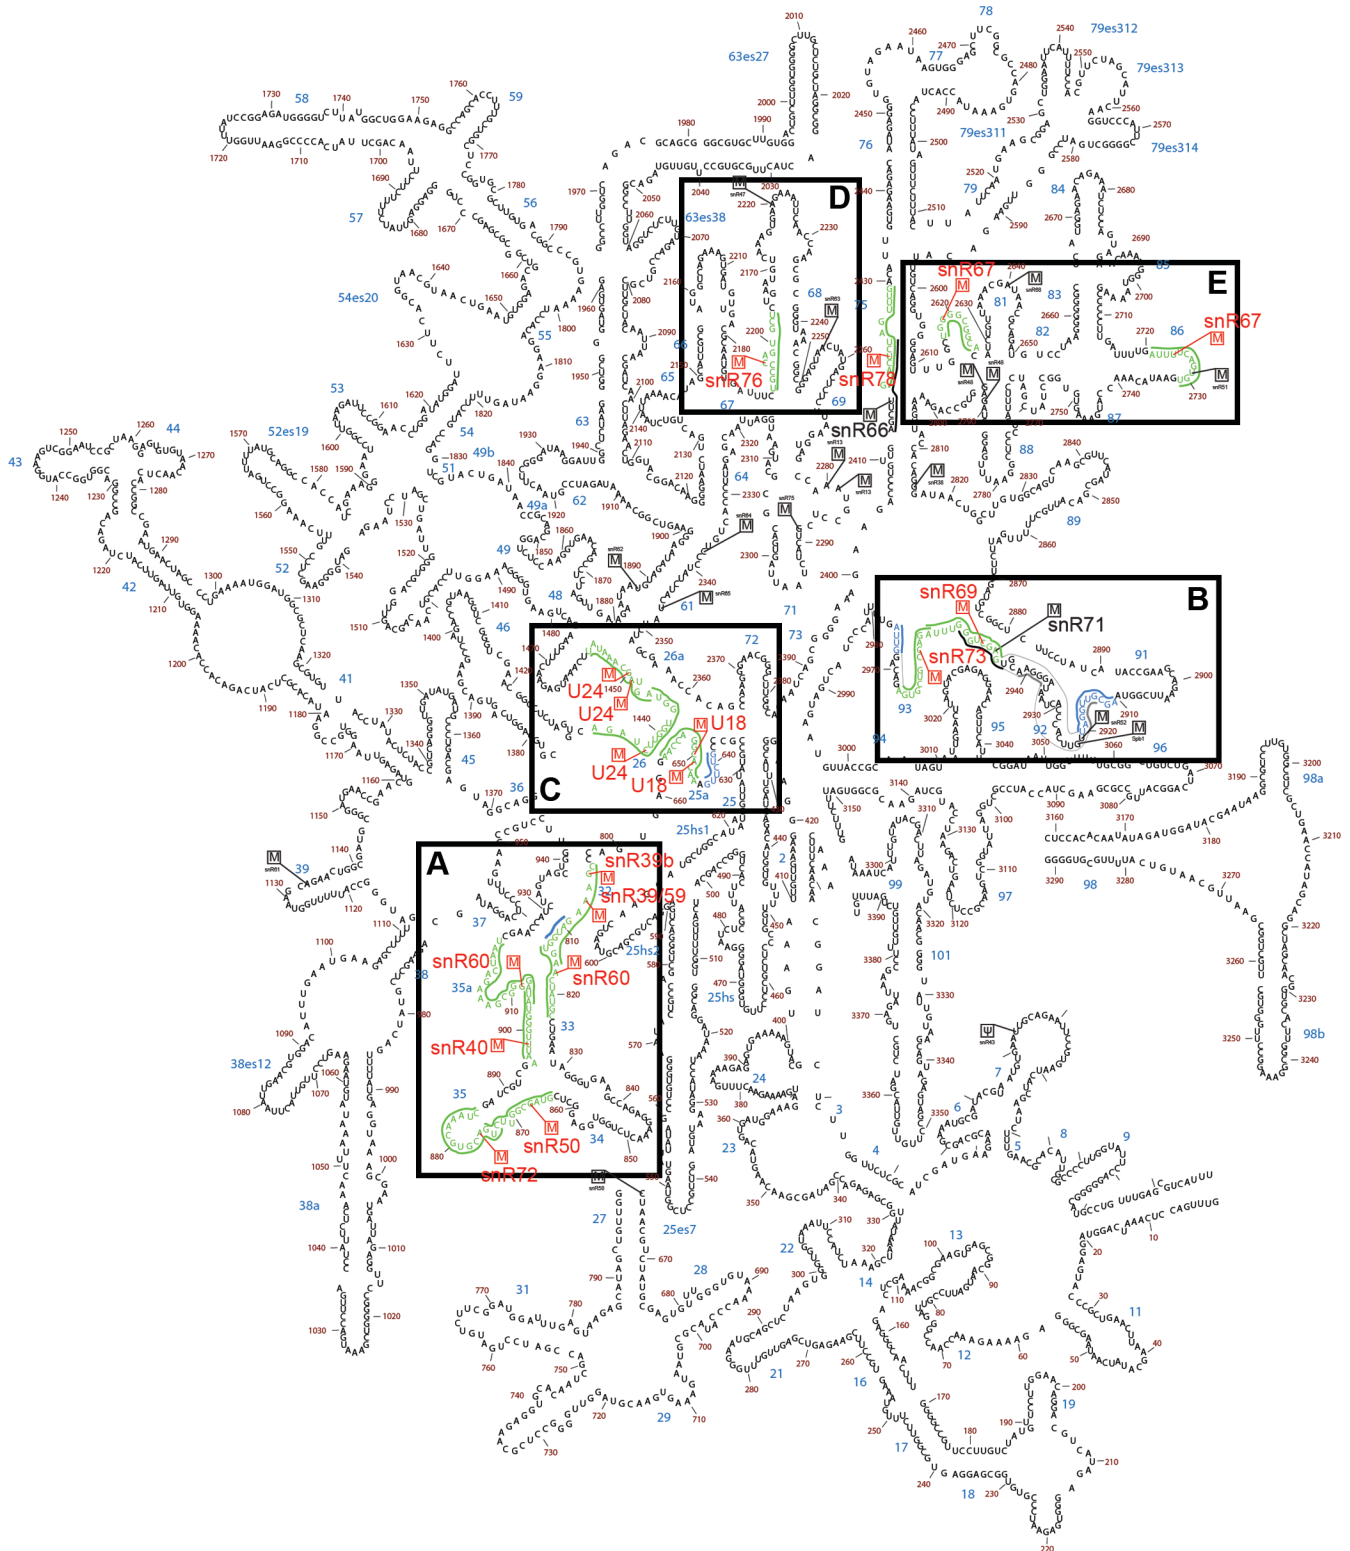

Aquino et al., Supplementary Figure S6

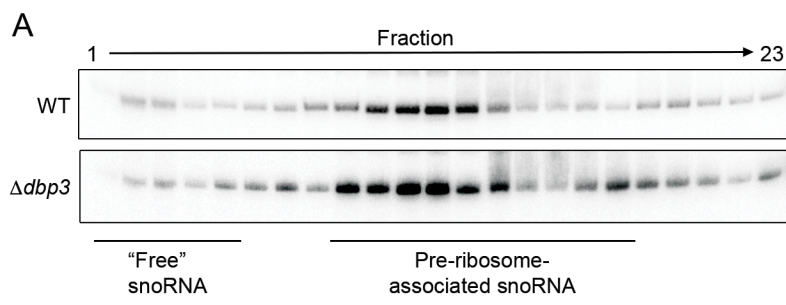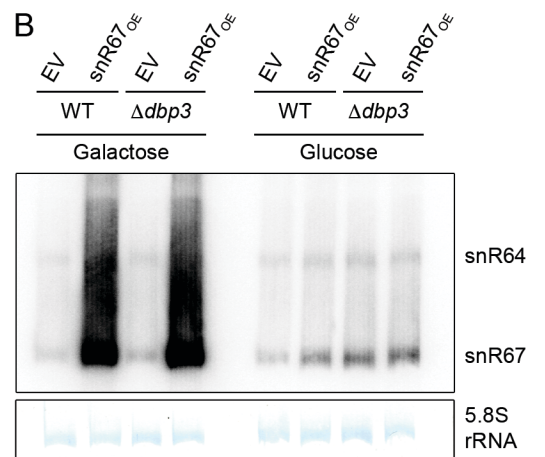

Aquino et al., Supplementary Figure S7

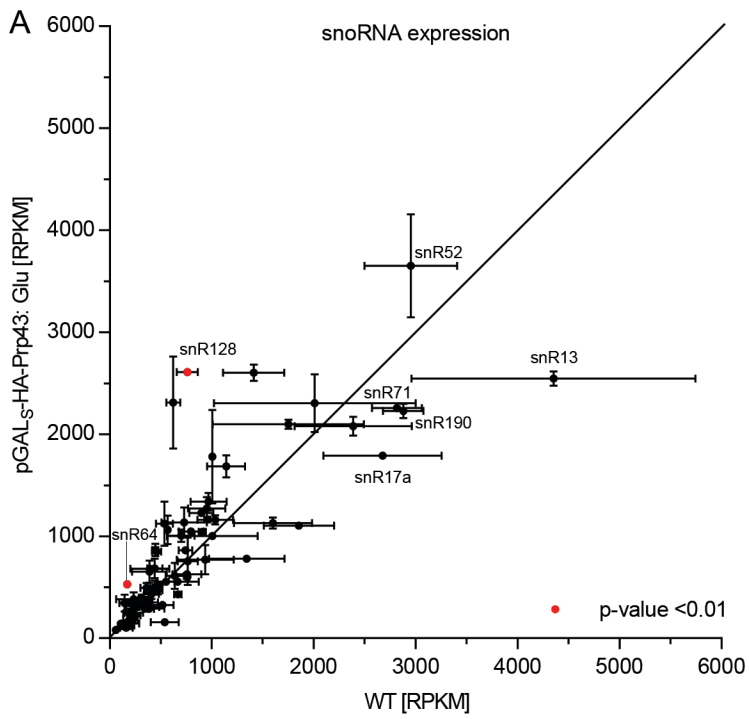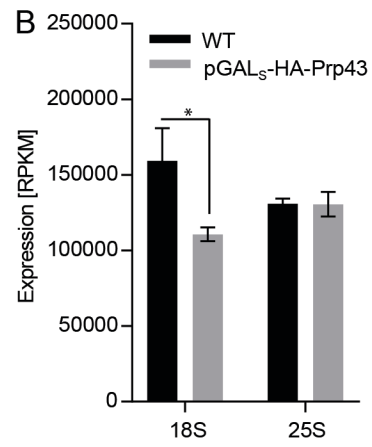

Aquino et al., Supplementary Figure S8
